# Supplementary material for: Compared to other front-of-pack nutrition labels, the Nutri-Score emerged as the most efficient to inform Swiss consumers on the nutritional quality of food products
Source: PubMed Central journal article supplement (PMC7046267; doi:10.1371/journal.pone.0228179), 2020-02-27
Supplement: pone.0228179.s005.pdf [file pone.0228179.s005.pdf]

| Labelling condition       | Cake n°1: higher nutritional quality                                                                                                                                                                                                                                                                                                                                                                              | Cake n°2: Medium nutritional quality | Cake n°3: Lower nutritional quality |           |           |      |          |           |           |                |           |    |     |    |    |    |                                                                                                                                                                                                                                                                                                                                                                                                                       |        |        |      |           |      |          |            |            |              |           |     |     |     |     |    |                                                                                                                                                                                                                                                                                                                                                                                                                             |        |        |      |           |      |          |              |            |                |           |     |     |     |     |    |
|---------------------------|-------------------------------------------------------------------------------------------------------------------------------------------------------------------------------------------------------------------------------------------------------------------------------------------------------------------------------------------------------------------------------------------------------------------|--------------------------------------|-------------------------------------|-----------|-----------|------|----------|-----------|-----------|----------------|-----------|----|-----|----|----|----|-----------------------------------------------------------------------------------------------------------------------------------------------------------------------------------------------------------------------------------------------------------------------------------------------------------------------------------------------------------------------------------------------------------------------|--------|--------|------|-----------|------|----------|------------|------------|--------------|-----------|-----|-----|-----|-----|----|-----------------------------------------------------------------------------------------------------------------------------------------------------------------------------------------------------------------------------------------------------------------------------------------------------------------------------------------------------------------------------------------------------------------------------|--------|--------|------|-----------|------|----------|--------------|------------|----------------|-----------|-----|-----|-----|-----|----|
| No label                  |                                                                                                                                                                                                                                                                                                                                                                                                                   |                                      |                                     |           |           |      |          |           |           |                |           |    |     |    |    |    |                                                                                                                                                                                                                                                                                                                                                                                                                       |        |        |      |           |      |          |            |            |              |           |     |     |     |     |    |                                                                                                                                                                                                                                                                                                                                                                                                                             |        |        |      |           |      |          |              |            |                |           |     |     |     |     |    |
| Health Star Rating system |                                                                                                                                                                                                                                                                                                                                                                                                                   |                                      |                                     |           |           |      |          |           |           |                |           |    |     |    |    |    |                                                                                                                                                                                                                                                                                                                                                                                                                       |        |        |      |           |      |          |            |            |              |           |     |     |     |     |    |                                                                                                                                                                                                                                                                                                                                                                                                                             |        |        |      |           |      |          |              |            |                |           |     |     |     |     |    |
| Multiple Traffic Lights   | <p>Each 50g serve contains</p> <table border="1"> <tr> <td>ENERGY</td> <td>MED</td> <td>MED</td> <td>MED</td> <td>LOW</td> </tr> <tr> <td>108 kcal</td> <td>Sugars 9g</td> <td>Fats 3.4g</td> <td>Saturates 1.3g</td> <td>Salt 0.1g</td> </tr> <tr> <td>5%</td> <td>10%</td> <td>5%</td> <td>7%</td> <td>2%</td> </tr> </table> <p>of an adult's reference intake<br/>Typical values per 100g: Energy 217kcal</p> | ENERGY                               | MED                                 | MED       | MED       | LOW  | 108 kcal | Sugars 9g | Fats 3.4g | Saturates 1.3g | Salt 0.1g | 5% | 10% | 5% | 7% | 2% | <p>Each 50g serve contains</p> <table border="1"> <tr> <td>ENERGY</td> <td>HIGH</td> <td>HIGH</td> <td>MED</td> <td>MED</td> </tr> <tr> <td>231kcal</td> <td>Sugars 17g</td> <td>Fats 13.5g</td> <td>Saturates 2g</td> <td>Salt 0.3g</td> </tr> <tr> <td>12%</td> <td>19%</td> <td>19%</td> <td>10%</td> <td>5%</td> </tr> </table> <p>of an adult's reference intake<br/>Typical values per 100g: Energy 463kcal</p> | ENERGY | HIGH   | HIGH | MED       | MED  | 231kcal  | Sugars 17g | Fats 13.5g | Saturates 2g | Salt 0.3g | 12% | 19% | 19% | 10% | 5% | <p>Each 50g serve contains</p> <table border="1"> <tr> <td>ENERGY</td> <td>HIGH</td> <td>HIGH</td> <td>HIGH</td> <td>MED</td> </tr> <tr> <td>211 kcal</td> <td>Sugars 13.4g</td> <td>Fats 12.1g</td> <td>Saturates 7.8g</td> <td>Salt 0.3g</td> </tr> <tr> <td>11%</td> <td>15%</td> <td>17%</td> <td>39%</td> <td>6%</td> </tr> </table> <p>of an adult's reference intake<br/>Typical values per 100g: Energy 422kcal</p> | ENERGY | HIGH   | HIGH | HIGH      | MED  | 211 kcal | Sugars 13.4g | Fats 12.1g | Saturates 7.8g | Salt 0.3g | 11% | 15% | 17% | 39% | 6% |
| ENERGY                    | MED                                                                                                                                                                                                                                                                                                                                                                                                               | MED                                  | MED                                 | LOW       |           |      |          |           |           |                |           |    |     |    |    |    |                                                                                                                                                                                                                                                                                                                                                                                                                       |        |        |      |           |      |          |            |            |              |           |     |     |     |     |    |                                                                                                                                                                                                                                                                                                                                                                                                                             |        |        |      |           |      |          |              |            |                |           |     |     |     |     |    |
| 108 kcal                  | Sugars 9g                                                                                                                                                                                                                                                                                                                                                                                                         | Fats 3.4g                            | Saturates 1.3g                      | Salt 0.1g |           |      |          |           |           |                |           |    |     |    |    |    |                                                                                                                                                                                                                                                                                                                                                                                                                       |        |        |      |           |      |          |            |            |              |           |     |     |     |     |    |                                                                                                                                                                                                                                                                                                                                                                                                                             |        |        |      |           |      |          |              |            |                |           |     |     |     |     |    |
| 5%                        | 10%                                                                                                                                                                                                                                                                                                                                                                                                               | 5%                                   | 7%                                  | 2%        |           |      |          |           |           |                |           |    |     |    |    |    |                                                                                                                                                                                                                                                                                                                                                                                                                       |        |        |      |           |      |          |            |            |              |           |     |     |     |     |    |                                                                                                                                                                                                                                                                                                                                                                                                                             |        |        |      |           |      |          |              |            |                |           |     |     |     |     |    |
| ENERGY                    | HIGH                                                                                                                                                                                                                                                                                                                                                                                                              | HIGH                                 | MED                                 | MED       |           |      |          |           |           |                |           |    |     |    |    |    |                                                                                                                                                                                                                                                                                                                                                                                                                       |        |        |      |           |      |          |            |            |              |           |     |     |     |     |    |                                                                                                                                                                                                                                                                                                                                                                                                                             |        |        |      |           |      |          |              |            |                |           |     |     |     |     |    |
| 231kcal                   | Sugars 17g                                                                                                                                                                                                                                                                                                                                                                                                        | Fats 13.5g                           | Saturates 2g                        | Salt 0.3g |           |      |          |           |           |                |           |    |     |    |    |    |                                                                                                                                                                                                                                                                                                                                                                                                                       |        |        |      |           |      |          |            |            |              |           |     |     |     |     |    |                                                                                                                                                                                                                                                                                                                                                                                                                             |        |        |      |           |      |          |              |            |                |           |     |     |     |     |    |
| 12%                       | 19%                                                                                                                                                                                                                                                                                                                                                                                                               | 19%                                  | 10%                                 | 5%        |           |      |          |           |           |                |           |    |     |    |    |    |                                                                                                                                                                                                                                                                                                                                                                                                                       |        |        |      |           |      |          |            |            |              |           |     |     |     |     |    |                                                                                                                                                                                                                                                                                                                                                                                                                             |        |        |      |           |      |          |              |            |                |           |     |     |     |     |    |
| ENERGY                    | HIGH                                                                                                                                                                                                                                                                                                                                                                                                              | HIGH                                 | HIGH                                | MED       |           |      |          |           |           |                |           |    |     |    |    |    |                                                                                                                                                                                                                                                                                                                                                                                                                       |        |        |      |           |      |          |            |            |              |           |     |     |     |     |    |                                                                                                                                                                                                                                                                                                                                                                                                                             |        |        |      |           |      |          |              |            |                |           |     |     |     |     |    |
| 211 kcal                  | Sugars 13.4g                                                                                                                                                                                                                                                                                                                                                                                                      | Fats 12.1g                           | Saturates 7.8g                      | Salt 0.3g |           |      |          |           |           |                |           |    |     |    |    |    |                                                                                                                                                                                                                                                                                                                                                                                                                       |        |        |      |           |      |          |            |            |              |           |     |     |     |     |    |                                                                                                                                                                                                                                                                                                                                                                                                                             |        |        |      |           |      |          |              |            |                |           |     |     |     |     |    |
| 11%                       | 15%                                                                                                                                                                                                                                                                                                                                                                                                               | 17%                                  | 39%                                 | 6%        |           |      |          |           |           |                |           |    |     |    |    |    |                                                                                                                                                                                                                                                                                                                                                                                                                       |        |        |      |           |      |          |            |            |              |           |     |     |     |     |    |                                                                                                                                                                                                                                                                                                                                                                                                                             |        |        |      |           |      |          |              |            |                |           |     |     |     |     |    |
| Nutri-Score               |                                                                                                                                                                                                                                                                                                                                                                                                                   |                                      |                                     |           |           |      |          |           |           |                |           |    |     |    |    |    |                                                                                                                                                                                                                                                                                                                                                                                                                       |        |        |      |           |      |          |            |            |              |           |     |     |     |     |    |                                                                                                                                                                                                                                                                                                                                                                                                                             |        |        |      |           |      |          |              |            |                |           |     |     |     |     |    |
| Reference Intakes label   | <p>Each 50g serve contains</p> <table border="1"> <tr> <td>Energy</td> <td>Sugars</td> <td>Fat</td> <td>Saturates</td> <td>Salt</td> </tr> <tr> <td>108 kcal</td> <td>9g</td> <td>3.4g</td> <td>1.3g</td> <td>0.1g</td> </tr> <tr> <td>5%</td> <td>10%</td> <td>5%</td> <td>7%</td> <td>2%</td> </tr> </table> <p>of an adult's Reference Intake</p>                                                              | Energy                               | Sugars                              | Fat       | Saturates | Salt | 108 kcal | 9g        | 3.4g      | 1.3g           | 0.1g      | 5% | 10% | 5% | 7% | 2% | <p>Each 50g serve contains</p> <table border="1"> <tr> <td>Energy</td> <td>Sugars</td> <td>Fat</td> <td>Saturates</td> <td>Salt</td> </tr> <tr> <td>231 kcal</td> <td>17g</td> <td>13.5g</td> <td>2g</td> <td>0.3g</td> </tr> <tr> <td>12%</td> <td>19%</td> <td>19%</td> <td>10%</td> <td>5%</td> </tr> </table> <p>of an adult's Reference Intake</p>                                                               | Energy | Sugars | Fat  | Saturates | Salt | 231 kcal | 17g        | 13.5g      | 2g           | 0.3g      | 12% | 19% | 19% | 10% | 5% | <p>Each 50g serve contains</p> <table border="1"> <tr> <td>Energy</td> <td>Sugars</td> <td>Fat</td> <td>Saturates</td> <td>Salt</td> </tr> <tr> <td>211 kcal</td> <td>13.4g</td> <td>12.1g</td> <td>7.8g</td> <td>0.3g</td> </tr> <tr> <td>11%</td> <td>15%</td> <td>17%</td> <td>39%</td> <td>6%</td> </tr> </table> <p>of an adult's Reference Intake</p>                                                                 | Energy | Sugars | Fat  | Saturates | Salt | 211 kcal | 13.4g        | 12.1g      | 7.8g           | 0.3g      | 11% | 15% | 17% | 39% | 6% |
| Energy                    | Sugars                                                                                                                                                                                                                                                                                                                                                                                                            | Fat                                  | Saturates                           | Salt      |           |      |          |           |           |                |           |    |     |    |    |    |                                                                                                                                                                                                                                                                                                                                                                                                                       |        |        |      |           |      |          |            |            |              |           |     |     |     |     |    |                                                                                                                                                                                                                                                                                                                                                                                                                             |        |        |      |           |      |          |              |            |                |           |     |     |     |     |    |
| 108 kcal                  | 9g                                                                                                                                                                                                                                                                                                                                                                                                                | 3.4g                                 | 1.3g                                | 0.1g      |           |      |          |           |           |                |           |    |     |    |    |    |                                                                                                                                                                                                                                                                                                                                                                                                                       |        |        |      |           |      |          |            |            |              |           |     |     |     |     |    |                                                                                                                                                                                                                                                                                                                                                                                                                             |        |        |      |           |      |          |              |            |                |           |     |     |     |     |    |
| 5%                        | 10%                                                                                                                                                                                                                                                                                                                                                                                                               | 5%                                   | 7%                                  | 2%        |           |      |          |           |           |                |           |    |     |    |    |    |                                                                                                                                                                                                                                                                                                                                                                                                                       |        |        |      |           |      |          |            |            |              |           |     |     |     |     |    |                                                                                                                                                                                                                                                                                                                                                                                                                             |        |        |      |           |      |          |              |            |                |           |     |     |     |     |    |
| Energy                    | Sugars                                                                                                                                                                                                                                                                                                                                                                                                            | Fat                                  | Saturates                           | Salt      |           |      |          |           |           |                |           |    |     |    |    |    |                                                                                                                                                                                                                                                                                                                                                                                                                       |        |        |      |           |      |          |            |            |              |           |     |     |     |     |    |                                                                                                                                                                                                                                                                                                                                                                                                                             |        |        |      |           |      |          |              |            |                |           |     |     |     |     |    |
| 231 kcal                  | 17g                                                                                                                                                                                                                                                                                                                                                                                                               | 13.5g                                | 2g                                  | 0.3g      |           |      |          |           |           |                |           |    |     |    |    |    |                                                                                                                                                                                                                                                                                                                                                                                                                       |        |        |      |           |      |          |            |            |              |           |     |     |     |     |    |                                                                                                                                                                                                                                                                                                                                                                                                                             |        |        |      |           |      |          |              |            |                |           |     |     |     |     |    |
| 12%                       | 19%                                                                                                                                                                                                                                                                                                                                                                                                               | 19%                                  | 10%                                 | 5%        |           |      |          |           |           |                |           |    |     |    |    |    |                                                                                                                                                                                                                                                                                                                                                                                                                       |        |        |      |           |      |          |            |            |              |           |     |     |     |     |    |                                                                                                                                                                                                                                                                                                                                                                                                                             |        |        |      |           |      |          |              |            |                |           |     |     |     |     |    |
| Energy                    | Sugars                                                                                                                                                                                                                                                                                                                                                                                                            | Fat                                  | Saturates                           | Salt      |           |      |          |           |           |                |           |    |     |    |    |    |                                                                                                                                                                                                                                                                                                                                                                                                                       |        |        |      |           |      |          |            |            |              |           |     |     |     |     |    |                                                                                                                                                                                                                                                                                                                                                                                                                             |        |        |      |           |      |          |              |            |                |           |     |     |     |     |    |
| 211 kcal                  | 13.4g                                                                                                                                                                                                                                                                                                                                                                                                             | 12.1g                                | 7.8g                                | 0.3g      |           |      |          |           |           |                |           |    |     |    |    |    |                                                                                                                                                                                                                                                                                                                                                                                                                       |        |        |      |           |      |          |            |            |              |           |     |     |     |     |    |                                                                                                                                                                                                                                                                                                                                                                                                                             |        |        |      |           |      |          |              |            |                |           |     |     |     |     |    |
| 11%                       | 15%                                                                                                                                                                                                                                                                                                                                                                                                               | 17%                                  | 39%                                 | 6%        |           |      |          |           |           |                |           |    |     |    |    |    |                                                                                                                                                                                                                                                                                                                                                                                                                       |        |        |      |           |      |          |            |            |              |           |     |     |     |     |    |                                                                                                                                                                                                                                                                                                                                                                                                                             |        |        |      |           |      |          |              |            |                |           |     |     |     |     |    |
| Warning symbol            |                                                                                                                                                                                                                                                                                                                                                                                                                   |                                      |                                     |           |           |      |          |           |           |                |           |    |     |    |    |    |                                                                                                                                                                                                                                                                                                                                                                                                                       |        |        |      |           |      |          |            |            |              |           |     |     |     |     |    |                                                                                                                                                                                                                                                                                                                                                                                                                             |        |        |      |           |      |          |              |            |                |           |     |     |     |     |    |
