# Supplementary material for: Compared to other front-of-pack nutrition labels, the Nutri-Score emerged as the most efficient to inform Swiss consumers on the nutritional quality of food products
Source: PubMed Central journal article supplement (PMC7046267; doi:10.1371/journal.pone.0228179), 2020-02-27
Supplement: pone.0228179.s006.pdf [file pone.0228179.s006.pdf]

| Labelling condition       | Cereal n°1: Higher nutritional quality                                                                                                                                                                                                                                                                                                                                                                                         | Cereal n°2: Medium nutritional quality | Cereal n°3: Lower nutritional quality |           |           |      |          |             |           |                 |           |    |    |     |     |    |                                                                                                                                                                                                                                                                                                                                                                                                                    |        |        |     |           |      |          |           |           |                |           |    |     |    |    |    |                                                                                                                                                                                                                                                                                                                                                                                                                      |        |        |     |           |      |          |             |           |                |           |    |     |    |    |    |
|---------------------------|--------------------------------------------------------------------------------------------------------------------------------------------------------------------------------------------------------------------------------------------------------------------------------------------------------------------------------------------------------------------------------------------------------------------------------|----------------------------------------|---------------------------------------|-----------|-----------|------|----------|-------------|-----------|-----------------|-----------|----|----|-----|-----|----|--------------------------------------------------------------------------------------------------------------------------------------------------------------------------------------------------------------------------------------------------------------------------------------------------------------------------------------------------------------------------------------------------------------------|--------|--------|-----|-----------|------|----------|-----------|-----------|----------------|-----------|----|-----|----|----|----|----------------------------------------------------------------------------------------------------------------------------------------------------------------------------------------------------------------------------------------------------------------------------------------------------------------------------------------------------------------------------------------------------------------------|--------|--------|-----|-----------|------|----------|-------------|-----------|----------------|-----------|----|-----|----|----|----|
| No label                  |                                                                                                                                                                                                                                                                                                                                                                                                                                |                                        |                                       |           |           |      |          |             |           |                 |           |    |    |     |     |    |                                                                                                                                                                                                                                                                                                                                                                                                                    |        |        |     |           |      |          |           |           |                |           |    |     |    |    |    |                                                                                                                                                                                                                                                                                                                                                                                                                      |        |        |     |           |      |          |             |           |                |           |    |     |    |    |    |
| Health Star Rating system |                                                                                                                                                                                                                                                                                                                                                                                                                                |                                        |                                       |           |           |      |          |             |           |                 |           |    |    |     |     |    |                                                                                                                                                                                                                                                                                                                                                                                                                    |        |        |     |           |      |          |           |           |                |           |    |     |    |    |    |                                                                                                                                                                                                                                                                                                                                                                                                                      |        |        |     |           |      |          |             |           |                |           |    |     |    |    |    |
| Multiple Traffic Lights   | <p>Each 30g serve contains</p> <table border="1"> <tr> <th>ENERGY</th> <th>MED</th> <th>LOW</th> <th>LOW</th> <th>MED</th> </tr> <tr> <td>113 kcal</td> <td>Sugars 2.4g</td> <td>Fats 0.2g</td> <td>Saturates &lt;0.1g</td> <td>Salt 0.3g</td> </tr> <tr> <td>6%</td> <td>3%</td> <td>&lt;1%</td> <td>&lt;1%</td> <td>5%</td> </tr> </table> <p>of an adult's reference intake<br/>Typical values per 100g: Energy 378kcal</p> | ENERGY                                 | MED                                   | LOW       | LOW       | MED  | 113 kcal | Sugars 2.4g | Fats 0.2g | Saturates <0.1g | Salt 0.3g | 6% | 3% | <1% | <1% | 5% | <p>Each 30g serve contains</p> <table border="1"> <tr> <th>ENERGY</th> <th>HIGH</th> <th>LOW</th> <th>LOW</th> <th>MED</th> </tr> <tr> <td>116 kcal</td> <td>Sugars 9g</td> <td>Fats 0.7g</td> <td>Saturates 0.3g</td> <td>Salt 0.2g</td> </tr> <tr> <td>6%</td> <td>10%</td> <td>1%</td> <td>2%</td> <td>4%</td> </tr> </table> <p>of an adult's reference intake<br/>Typical values per 100g: Energy 387kcal</p> | ENERGY | HIGH   | LOW | LOW       | MED  | 116 kcal | Sugars 9g | Fats 0.7g | Saturates 0.3g | Salt 0.2g | 6% | 10% | 1% | 2% | 4% | <p>Each 30g serve contains</p> <table border="1"> <tr> <th>ENERGY</th> <th>HIGH</th> <th>MED</th> <th>MED</th> <th>MED</th> </tr> <tr> <td>136 kcal</td> <td>Sugars 8.7g</td> <td>Fats 4.8g</td> <td>Saturates 1.2g</td> <td>Salt 0.3g</td> </tr> <tr> <td>7%</td> <td>10%</td> <td>7%</td> <td>6%</td> <td>6%</td> </tr> </table> <p>of an adult's reference intake<br/>Typical values per 100g: Energy 451kcal</p> | ENERGY | HIGH   | MED | MED       | MED  | 136 kcal | Sugars 8.7g | Fats 4.8g | Saturates 1.2g | Salt 0.3g | 7% | 10% | 7% | 6% | 6% |
| ENERGY                    | MED                                                                                                                                                                                                                                                                                                                                                                                                                            | LOW                                    | LOW                                   | MED       |           |      |          |             |           |                 |           |    |    |     |     |    |                                                                                                                                                                                                                                                                                                                                                                                                                    |        |        |     |           |      |          |           |           |                |           |    |     |    |    |    |                                                                                                                                                                                                                                                                                                                                                                                                                      |        |        |     |           |      |          |             |           |                |           |    |     |    |    |    |
| 113 kcal                  | Sugars 2.4g                                                                                                                                                                                                                                                                                                                                                                                                                    | Fats 0.2g                              | Saturates <0.1g                       | Salt 0.3g |           |      |          |             |           |                 |           |    |    |     |     |    |                                                                                                                                                                                                                                                                                                                                                                                                                    |        |        |     |           |      |          |           |           |                |           |    |     |    |    |    |                                                                                                                                                                                                                                                                                                                                                                                                                      |        |        |     |           |      |          |             |           |                |           |    |     |    |    |    |
| 6%                        | 3%                                                                                                                                                                                                                                                                                                                                                                                                                             | <1%                                    | <1%                                   | 5%        |           |      |          |             |           |                 |           |    |    |     |     |    |                                                                                                                                                                                                                                                                                                                                                                                                                    |        |        |     |           |      |          |           |           |                |           |    |     |    |    |    |                                                                                                                                                                                                                                                                                                                                                                                                                      |        |        |     |           |      |          |             |           |                |           |    |     |    |    |    |
| ENERGY                    | HIGH                                                                                                                                                                                                                                                                                                                                                                                                                           | LOW                                    | LOW                                   | MED       |           |      |          |             |           |                 |           |    |    |     |     |    |                                                                                                                                                                                                                                                                                                                                                                                                                    |        |        |     |           |      |          |           |           |                |           |    |     |    |    |    |                                                                                                                                                                                                                                                                                                                                                                                                                      |        |        |     |           |      |          |             |           |                |           |    |     |    |    |    |
| 116 kcal                  | Sugars 9g                                                                                                                                                                                                                                                                                                                                                                                                                      | Fats 0.7g                              | Saturates 0.3g                        | Salt 0.2g |           |      |          |             |           |                 |           |    |    |     |     |    |                                                                                                                                                                                                                                                                                                                                                                                                                    |        |        |     |           |      |          |           |           |                |           |    |     |    |    |    |                                                                                                                                                                                                                                                                                                                                                                                                                      |        |        |     |           |      |          |             |           |                |           |    |     |    |    |    |
| 6%                        | 10%                                                                                                                                                                                                                                                                                                                                                                                                                            | 1%                                     | 2%                                    | 4%        |           |      |          |             |           |                 |           |    |    |     |     |    |                                                                                                                                                                                                                                                                                                                                                                                                                    |        |        |     |           |      |          |           |           |                |           |    |     |    |    |    |                                                                                                                                                                                                                                                                                                                                                                                                                      |        |        |     |           |      |          |             |           |                |           |    |     |    |    |    |
| ENERGY                    | HIGH                                                                                                                                                                                                                                                                                                                                                                                                                           | MED                                    | MED                                   | MED       |           |      |          |             |           |                 |           |    |    |     |     |    |                                                                                                                                                                                                                                                                                                                                                                                                                    |        |        |     |           |      |          |           |           |                |           |    |     |    |    |    |                                                                                                                                                                                                                                                                                                                                                                                                                      |        |        |     |           |      |          |             |           |                |           |    |     |    |    |    |
| 136 kcal                  | Sugars 8.7g                                                                                                                                                                                                                                                                                                                                                                                                                    | Fats 4.8g                              | Saturates 1.2g                        | Salt 0.3g |           |      |          |             |           |                 |           |    |    |     |     |    |                                                                                                                                                                                                                                                                                                                                                                                                                    |        |        |     |           |      |          |           |           |                |           |    |     |    |    |    |                                                                                                                                                                                                                                                                                                                                                                                                                      |        |        |     |           |      |          |             |           |                |           |    |     |    |    |    |
| 7%                        | 10%                                                                                                                                                                                                                                                                                                                                                                                                                            | 7%                                     | 6%                                    | 6%        |           |      |          |             |           |                 |           |    |    |     |     |    |                                                                                                                                                                                                                                                                                                                                                                                                                    |        |        |     |           |      |          |           |           |                |           |    |     |    |    |    |                                                                                                                                                                                                                                                                                                                                                                                                                      |        |        |     |           |      |          |             |           |                |           |    |     |    |    |    |
| Nutri-Score               |                                                                                                                                                                                                                                                                                                                                                                                                                                |                                        |                                       |           |           |      |          |             |           |                 |           |    |    |     |     |    |                                                                                                                                                                                                                                                                                                                                                                                                                    |        |        |     |           |      |          |           |           |                |           |    |     |    |    |    |                                                                                                                                                                                                                                                                                                                                                                                                                      |        |        |     |           |      |          |             |           |                |           |    |     |    |    |    |
| Reference Intakes label   | <p>Each 30g serve contains</p> <table border="1"> <tr> <th>Energy</th> <th>Sugars</th> <th>Fat</th> <th>Saturates</th> <th>Salt</th> </tr> <tr> <td>113 kcal</td> <td>2.4g</td> <td>0.2g</td> <td>&lt;0.1g</td> <td>0.3g</td> </tr> <tr> <td>6%</td> <td>3%</td> <td>&lt;1%</td> <td>&lt;1%</td> <td>5%</td> </tr> </table> <p>of an adult's Reference Intake</p>                                                              | Energy                                 | Sugars                                | Fat       | Saturates | Salt | 113 kcal | 2.4g        | 0.2g      | <0.1g           | 0.3g      | 6% | 3% | <1% | <1% | 5% | <p>Each 30g serve contains</p> <table border="1"> <tr> <th>Energy</th> <th>Sugars</th> <th>Fat</th> <th>Saturates</th> <th>Salt</th> </tr> <tr> <td>116 kcal</td> <td>9g</td> <td>0.7g</td> <td>0.3g</td> <td>0.2g</td> </tr> <tr> <td>6%</td> <td>10%</td> <td>1%</td> <td>2%</td> <td>4%</td> </tr> </table> <p>of an adult's Reference Intake</p>                                                               | Energy | Sugars | Fat | Saturates | Salt | 116 kcal | 9g        | 0.7g      | 0.3g           | 0.2g      | 6% | 10% | 1% | 2% | 4% | <p>Each 30g serve contains</p> <table border="1"> <tr> <th>Energy</th> <th>Sugars</th> <th>Fat</th> <th>Saturates</th> <th>Salt</th> </tr> <tr> <td>136 kcal</td> <td>8.7g</td> <td>4.8g</td> <td>1.2g</td> <td>0.3g</td> </tr> <tr> <td>7%</td> <td>10%</td> <td>7%</td> <td>6%</td> <td>6%</td> </tr> </table> <p>of an adult's Reference Intake</p>                                                               | Energy | Sugars | Fat | Saturates | Salt | 136 kcal | 8.7g        | 4.8g      | 1.2g           | 0.3g      | 7% | 10% | 7% | 6% | 6% |
| Energy                    | Sugars                                                                                                                                                                                                                                                                                                                                                                                                                         | Fat                                    | Saturates                             | Salt      |           |      |          |             |           |                 |           |    |    |     |     |    |                                                                                                                                                                                                                                                                                                                                                                                                                    |        |        |     |           |      |          |           |           |                |           |    |     |    |    |    |                                                                                                                                                                                                                                                                                                                                                                                                                      |        |        |     |           |      |          |             |           |                |           |    |     |    |    |    |
| 113 kcal                  | 2.4g                                                                                                                                                                                                                                                                                                                                                                                                                           | 0.2g                                   | <0.1g                                 | 0.3g      |           |      |          |             |           |                 |           |    |    |     |     |    |                                                                                                                                                                                                                                                                                                                                                                                                                    |        |        |     |           |      |          |           |           |                |           |    |     |    |    |    |                                                                                                                                                                                                                                                                                                                                                                                                                      |        |        |     |           |      |          |             |           |                |           |    |     |    |    |    |
| 6%                        | 3%                                                                                                                                                                                                                                                                                                                                                                                                                             | <1%                                    | <1%                                   | 5%        |           |      |          |             |           |                 |           |    |    |     |     |    |                                                                                                                                                                                                                                                                                                                                                                                                                    |        |        |     |           |      |          |           |           |                |           |    |     |    |    |    |                                                                                                                                                                                                                                                                                                                                                                                                                      |        |        |     |           |      |          |             |           |                |           |    |     |    |    |    |
| Energy                    | Sugars                                                                                                                                                                                                                                                                                                                                                                                                                         | Fat                                    | Saturates                             | Salt      |           |      |          |             |           |                 |           |    |    |     |     |    |                                                                                                                                                                                                                                                                                                                                                                                                                    |        |        |     |           |      |          |           |           |                |           |    |     |    |    |    |                                                                                                                                                                                                                                                                                                                                                                                                                      |        |        |     |           |      |          |             |           |                |           |    |     |    |    |    |
| 116 kcal                  | 9g                                                                                                                                                                                                                                                                                                                                                                                                                             | 0.7g                                   | 0.3g                                  | 0.2g      |           |      |          |             |           |                 |           |    |    |     |     |    |                                                                                                                                                                                                                                                                                                                                                                                                                    |        |        |     |           |      |          |           |           |                |           |    |     |    |    |    |                                                                                                                                                                                                                                                                                                                                                                                                                      |        |        |     |           |      |          |             |           |                |           |    |     |    |    |    |
| 6%                        | 10%                                                                                                                                                                                                                                                                                                                                                                                                                            | 1%                                     | 2%                                    | 4%        |           |      |          |             |           |                 |           |    |    |     |     |    |                                                                                                                                                                                                                                                                                                                                                                                                                    |        |        |     |           |      |          |           |           |                |           |    |     |    |    |    |                                                                                                                                                                                                                                                                                                                                                                                                                      |        |        |     |           |      |          |             |           |                |           |    |     |    |    |    |
| Energy                    | Sugars                                                                                                                                                                                                                                                                                                                                                                                                                         | Fat                                    | Saturates                             | Salt      |           |      |          |             |           |                 |           |    |    |     |     |    |                                                                                                                                                                                                                                                                                                                                                                                                                    |        |        |     |           |      |          |           |           |                |           |    |     |    |    |    |                                                                                                                                                                                                                                                                                                                                                                                                                      |        |        |     |           |      |          |             |           |                |           |    |     |    |    |    |
| 136 kcal                  | 8.7g                                                                                                                                                                                                                                                                                                                                                                                                                           | 4.8g                                   | 1.2g                                  | 0.3g      |           |      |          |             |           |                 |           |    |    |     |     |    |                                                                                                                                                                                                                                                                                                                                                                                                                    |        |        |     |           |      |          |           |           |                |           |    |     |    |    |    |                                                                                                                                                                                                                                                                                                                                                                                                                      |        |        |     |           |      |          |             |           |                |           |    |     |    |    |    |
| 7%                        | 10%                                                                                                                                                                                                                                                                                                                                                                                                                            | 7%                                     | 6%                                    | 6%        |           |      |          |             |           |                 |           |    |    |     |     |    |                                                                                                                                                                                                                                                                                                                                                                                                                    |        |        |     |           |      |          |           |           |                |           |    |     |    |    |    |                                                                                                                                                                                                                                                                                                                                                                                                                      |        |        |     |           |      |          |             |           |                |           |    |     |    |    |    |
| Warning symbol            |                                                                                                                                                                                                                                                                                                                                                                                                                                | <br>                                   | <br><br>                              |           |           |      |          |             |           |                 |           |    |    |     |     |    |                                                                                                                                                                                                                                                                                                                                                                                                                    |        |        |     |           |      |          |           |           |                |           |    |     |    |    |    |                                                                                                                                                                                                                                                                                                                                                                                                                      |        |        |     |           |      |          |             |           |                |           |    |     |    |    |    |
