# Supplementary material for: Compared to other front-of-pack nutrition labels, the Nutri-Score emerged as the most efficient to inform Swiss consumers on the nutritional quality of food products
Source: PubMed Central journal article supplement (PMC7046267; doi:10.1371/journal.pone.0228179), 2020-02-27
Supplement: pone.0228179.s007.pdf [file pone.0228179.s007.pdf]

| Labelling condition       | Pizza n°1: higher nutritional quality                                                                                                                                                                                                                                                                                                                                                                                                    | Pizza n°2: Medium nutritional quality                                               | Pizza n°3: Lower nutritional quality                                                  |              |           |      |          |                |               |                   |              |     |    |     |     |     |                                                                                                                                                                                                                                                                                                                                                                                                                                         |        |        |     |           |      |          |                |               |                   |            |     |    |     |     |     |                                                                                                                                                                                                                                                                                                                                                                                                                                              |        |        |      |           |      |          |                |               |                    |              |     |    |     |     |     |
|---------------------------|------------------------------------------------------------------------------------------------------------------------------------------------------------------------------------------------------------------------------------------------------------------------------------------------------------------------------------------------------------------------------------------------------------------------------------------|-------------------------------------------------------------------------------------|---------------------------------------------------------------------------------------|--------------|-----------|------|----------|----------------|---------------|-------------------|--------------|-----|----|-----|-----|-----|-----------------------------------------------------------------------------------------------------------------------------------------------------------------------------------------------------------------------------------------------------------------------------------------------------------------------------------------------------------------------------------------------------------------------------------------|--------|--------|-----|-----------|------|----------|----------------|---------------|-------------------|------------|-----|----|-----|-----|-----|----------------------------------------------------------------------------------------------------------------------------------------------------------------------------------------------------------------------------------------------------------------------------------------------------------------------------------------------------------------------------------------------------------------------------------------------|--------|--------|------|-----------|------|----------|----------------|---------------|--------------------|--------------|-----|----|-----|-----|-----|
| No label                  | 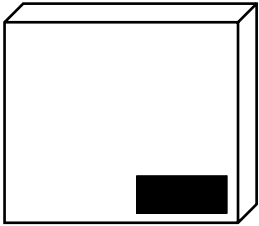                                                                                                                                                                                                                                                                                                                                                        |   |    |              |           |      |          |                |               |                   |              |     |    |     |     |     |                                                                                                                                                                                                                                                                                                                                                                                                                                         |        |        |     |           |      |          |                |               |                   |            |     |    |     |     |     |                                                                                                                                                                                                                                                                                                                                                                                                                                              |        |        |      |           |      |          |                |               |                    |              |     |    |     |     |     |
| Health Star Rating System |                                                                                                                                                                                                                                                                                                                                                         |   |    |              |           |      |          |                |               |                   |              |     |    |     |     |     |                                                                                                                                                                                                                                                                                                                                                                                                                                         |        |        |     |           |      |          |                |               |                   |            |     |    |     |     |     |                                                                                                                                                                                                                                                                                                                                                                                                                                              |        |        |      |           |      |          |                |               |                    |              |     |    |     |     |     |
| Multiple Traffic Lights   | <p>Each 170g serve contains</p> <table border="1"> <tr> <td>ENERGY</td> <td>LOW</td> <td>MED</td> <td>MED</td> <td>MED</td> </tr> <tr> <td>325 kcal</td> <td>Sugars<br/>4.6g</td> <td>Fats<br/>12.2g</td> <td>Saturates<br/>4.4g</td> <td>Salt<br/>1.5g</td> </tr> <tr> <td>16%</td> <td>5%</td> <td>17%</td> <td>22%</td> <td>24%</td> </tr> </table> <p>of an adult's reference intake<br/>Typical values per 100g: Energy 191kcal</p> | ENERGY                                                                              | LOW                                                                                   | MED          | MED       | MED  | 325 kcal | Sugars<br>4.6g | Fats<br>12.2g | Saturates<br>4.4g | Salt<br>1.5g | 16% | 5% | 17% | 22% | 24% | <p>Each 170g serve contains</p> <table border="1"> <tr> <td>ENERGY</td> <td>LOW</td> <td>MED</td> <td>MED</td> <td>HIGH</td> </tr> <tr> <td>393 kcal</td> <td>Sugars<br/>3.9g</td> <td>Fats<br/>18.5g</td> <td>Saturates<br/>5.1g</td> <td>Salt<br/>3g</td> </tr> <tr> <td>20%</td> <td>4%</td> <td>26%</td> <td>26%</td> <td>50%</td> </tr> </table> <p>of an adult's reference intake<br/>Typical values per 100g: Energy 231kcal</p> | ENERGY | LOW    | MED | MED       | HIGH | 393 kcal | Sugars<br>3.9g | Fats<br>18.5g | Saturates<br>5.1g | Salt<br>3g | 20% | 4% | 26% | 26% | 50% | <p>Each 170g serve contains</p> <table border="1"> <tr> <td>ENERGY</td> <td>LOW</td> <td>HIGH</td> <td>HIGH</td> <td>HIGH</td> </tr> <tr> <td>466 kcal</td> <td>Sugars<br/>2.3g</td> <td>Fats<br/>28.4g</td> <td>Saturates<br/>14.7g</td> <td>Salt<br/>2.6g</td> </tr> <tr> <td>23%</td> <td>3%</td> <td>41%</td> <td>74%</td> <td>43%</td> </tr> </table> <p>of an adult's reference intake<br/>Typical values per 100g: Energy 274kcal</p> | ENERGY | LOW    | HIGH | HIGH      | HIGH | 466 kcal | Sugars<br>2.3g | Fats<br>28.4g | Saturates<br>14.7g | Salt<br>2.6g | 23% | 3% | 41% | 74% | 43% |
| ENERGY                    | LOW                                                                                                                                                                                                                                                                                                                                                                                                                                      | MED                                                                                 | MED                                                                                   | MED          |           |      |          |                |               |                   |              |     |    |     |     |     |                                                                                                                                                                                                                                                                                                                                                                                                                                         |        |        |     |           |      |          |                |               |                   |            |     |    |     |     |     |                                                                                                                                                                                                                                                                                                                                                                                                                                              |        |        |      |           |      |          |                |               |                    |              |     |    |     |     |     |
| 325 kcal                  | Sugars<br>4.6g                                                                                                                                                                                                                                                                                                                                                                                                                           | Fats<br>12.2g                                                                       | Saturates<br>4.4g                                                                     | Salt<br>1.5g |           |      |          |                |               |                   |              |     |    |     |     |     |                                                                                                                                                                                                                                                                                                                                                                                                                                         |        |        |     |           |      |          |                |               |                   |            |     |    |     |     |     |                                                                                                                                                                                                                                                                                                                                                                                                                                              |        |        |      |           |      |          |                |               |                    |              |     |    |     |     |     |
| 16%                       | 5%                                                                                                                                                                                                                                                                                                                                                                                                                                       | 17%                                                                                 | 22%                                                                                   | 24%          |           |      |          |                |               |                   |              |     |    |     |     |     |                                                                                                                                                                                                                                                                                                                                                                                                                                         |        |        |     |           |      |          |                |               |                   |            |     |    |     |     |     |                                                                                                                                                                                                                                                                                                                                                                                                                                              |        |        |      |           |      |          |                |               |                    |              |     |    |     |     |     |
| ENERGY                    | LOW                                                                                                                                                                                                                                                                                                                                                                                                                                      | MED                                                                                 | MED                                                                                   | HIGH         |           |      |          |                |               |                   |              |     |    |     |     |     |                                                                                                                                                                                                                                                                                                                                                                                                                                         |        |        |     |           |      |          |                |               |                   |            |     |    |     |     |     |                                                                                                                                                                                                                                                                                                                                                                                                                                              |        |        |      |           |      |          |                |               |                    |              |     |    |     |     |     |
| 393 kcal                  | Sugars<br>3.9g                                                                                                                                                                                                                                                                                                                                                                                                                           | Fats<br>18.5g                                                                       | Saturates<br>5.1g                                                                     | Salt<br>3g   |           |      |          |                |               |                   |              |     |    |     |     |     |                                                                                                                                                                                                                                                                                                                                                                                                                                         |        |        |     |           |      |          |                |               |                   |            |     |    |     |     |     |                                                                                                                                                                                                                                                                                                                                                                                                                                              |        |        |      |           |      |          |                |               |                    |              |     |    |     |     |     |
| 20%                       | 4%                                                                                                                                                                                                                                                                                                                                                                                                                                       | 26%                                                                                 | 26%                                                                                   | 50%          |           |      |          |                |               |                   |              |     |    |     |     |     |                                                                                                                                                                                                                                                                                                                                                                                                                                         |        |        |     |           |      |          |                |               |                   |            |     |    |     |     |     |                                                                                                                                                                                                                                                                                                                                                                                                                                              |        |        |      |           |      |          |                |               |                    |              |     |    |     |     |     |
| ENERGY                    | LOW                                                                                                                                                                                                                                                                                                                                                                                                                                      | HIGH                                                                                | HIGH                                                                                  | HIGH         |           |      |          |                |               |                   |              |     |    |     |     |     |                                                                                                                                                                                                                                                                                                                                                                                                                                         |        |        |     |           |      |          |                |               |                   |            |     |    |     |     |     |                                                                                                                                                                                                                                                                                                                                                                                                                                              |        |        |      |           |      |          |                |               |                    |              |     |    |     |     |     |
| 466 kcal                  | Sugars<br>2.3g                                                                                                                                                                                                                                                                                                                                                                                                                           | Fats<br>28.4g                                                                       | Saturates<br>14.7g                                                                    | Salt<br>2.6g |           |      |          |                |               |                   |              |     |    |     |     |     |                                                                                                                                                                                                                                                                                                                                                                                                                                         |        |        |     |           |      |          |                |               |                   |            |     |    |     |     |     |                                                                                                                                                                                                                                                                                                                                                                                                                                              |        |        |      |           |      |          |                |               |                    |              |     |    |     |     |     |
| 23%                       | 3%                                                                                                                                                                                                                                                                                                                                                                                                                                       | 41%                                                                                 | 74%                                                                                   | 43%          |           |      |          |                |               |                   |              |     |    |     |     |     |                                                                                                                                                                                                                                                                                                                                                                                                                                         |        |        |     |           |      |          |                |               |                   |            |     |    |     |     |     |                                                                                                                                                                                                                                                                                                                                                                                                                                              |        |        |      |           |      |          |                |               |                    |              |     |    |     |     |     |
| Nutri-Score               |                                                                                                                                                                                                                                                                                                                                                         |   |    |              |           |      |          |                |               |                   |              |     |    |     |     |     |                                                                                                                                                                                                                                                                                                                                                                                                                                         |        |        |     |           |      |          |                |               |                   |            |     |    |     |     |     |                                                                                                                                                                                                                                                                                                                                                                                                                                              |        |        |      |           |      |          |                |               |                    |              |     |    |     |     |     |
| Reference Intakes label   | <p>Each 170g serve contains</p> <table border="1"> <tr> <td>Energy</td> <td>Sugars</td> <td>Fat</td> <td>Saturates</td> <td>Salt</td> </tr> <tr> <td>325 kcal</td> <td>4.6g</td> <td>12.2g</td> <td>4.4g</td> <td>1.5g</td> </tr> <tr> <td>16%</td> <td>5%</td> <td>17%</td> <td>22%</td> <td>24%</td> </tr> </table> <p>of an adult's Reference Intake</p>                                                                              | Energy                                                                              | Sugars                                                                                | Fat          | Saturates | Salt | 325 kcal | 4.6g           | 12.2g         | 4.4g              | 1.5g         | 16% | 5% | 17% | 22% | 24% | <p>Each 170g serve contains</p> <table border="1"> <tr> <td>Energy</td> <td>Sugars</td> <td>Fat</td> <td>Saturates</td> <td>Salt</td> </tr> <tr> <td>393 kcal</td> <td>3.9g</td> <td>18.5g</td> <td>5.1g</td> <td>3g</td> </tr> <tr> <td>20%</td> <td>4%</td> <td>26%</td> <td>26%</td> <td>50%</td> </tr> </table> <p>of an adult's Reference Intake</p>                                                                               | Energy | Sugars | Fat | Saturates | Salt | 393 kcal | 3.9g           | 18.5g         | 5.1g              | 3g         | 20% | 4% | 26% | 26% | 50% | <p>Each 170g serve contains</p> <table border="1"> <tr> <td>Energy</td> <td>Sugars</td> <td>Fat</td> <td>Saturates</td> <td>Salt</td> </tr> <tr> <td>466 kcal</td> <td>2.3g</td> <td>28.4g</td> <td>14.7g</td> <td>2.6g</td> </tr> <tr> <td>23%</td> <td>3%</td> <td>41%</td> <td>74%</td> <td>43%</td> </tr> </table> <p>of an adult's Reference Intake</p>                                                                                 | Energy | Sugars | Fat  | Saturates | Salt | 466 kcal | 2.3g           | 28.4g         | 14.7g              | 2.6g         | 23% | 3% | 41% | 74% | 43% |
| Energy                    | Sugars                                                                                                                                                                                                                                                                                                                                                                                                                                   | Fat                                                                                 | Saturates                                                                             | Salt         |           |      |          |                |               |                   |              |     |    |     |     |     |                                                                                                                                                                                                                                                                                                                                                                                                                                         |        |        |     |           |      |          |                |               |                   |            |     |    |     |     |     |                                                                                                                                                                                                                                                                                                                                                                                                                                              |        |        |      |           |      |          |                |               |                    |              |     |    |     |     |     |
| 325 kcal                  | 4.6g                                                                                                                                                                                                                                                                                                                                                                                                                                     | 12.2g                                                                               | 4.4g                                                                                  | 1.5g         |           |      |          |                |               |                   |              |     |    |     |     |     |                                                                                                                                                                                                                                                                                                                                                                                                                                         |        |        |     |           |      |          |                |               |                   |            |     |    |     |     |     |                                                                                                                                                                                                                                                                                                                                                                                                                                              |        |        |      |           |      |          |                |               |                    |              |     |    |     |     |     |
| 16%                       | 5%                                                                                                                                                                                                                                                                                                                                                                                                                                       | 17%                                                                                 | 22%                                                                                   | 24%          |           |      |          |                |               |                   |              |     |    |     |     |     |                                                                                                                                                                                                                                                                                                                                                                                                                                         |        |        |     |           |      |          |                |               |                   |            |     |    |     |     |     |                                                                                                                                                                                                                                                                                                                                                                                                                                              |        |        |      |           |      |          |                |               |                    |              |     |    |     |     |     |
| Energy                    | Sugars                                                                                                                                                                                                                                                                                                                                                                                                                                   | Fat                                                                                 | Saturates                                                                             | Salt         |           |      |          |                |               |                   |              |     |    |     |     |     |                                                                                                                                                                                                                                                                                                                                                                                                                                         |        |        |     |           |      |          |                |               |                   |            |     |    |     |     |     |                                                                                                                                                                                                                                                                                                                                                                                                                                              |        |        |      |           |      |          |                |               |                    |              |     |    |     |     |     |
| 393 kcal                  | 3.9g                                                                                                                                                                                                                                                                                                                                                                                                                                     | 18.5g                                                                               | 5.1g                                                                                  | 3g           |           |      |          |                |               |                   |              |     |    |     |     |     |                                                                                                                                                                                                                                                                                                                                                                                                                                         |        |        |     |           |      |          |                |               |                   |            |     |    |     |     |     |                                                                                                                                                                                                                                                                                                                                                                                                                                              |        |        |      |           |      |          |                |               |                    |              |     |    |     |     |     |
| 20%                       | 4%                                                                                                                                                                                                                                                                                                                                                                                                                                       | 26%                                                                                 | 26%                                                                                   | 50%          |           |      |          |                |               |                   |              |     |    |     |     |     |                                                                                                                                                                                                                                                                                                                                                                                                                                         |        |        |     |           |      |          |                |               |                   |            |     |    |     |     |     |                                                                                                                                                                                                                                                                                                                                                                                                                                              |        |        |      |           |      |          |                |               |                    |              |     |    |     |     |     |
| Energy                    | Sugars                                                                                                                                                                                                                                                                                                                                                                                                                                   | Fat                                                                                 | Saturates                                                                             | Salt         |           |      |          |                |               |                   |              |     |    |     |     |     |                                                                                                                                                                                                                                                                                                                                                                                                                                         |        |        |     |           |      |          |                |               |                   |            |     |    |     |     |     |                                                                                                                                                                                                                                                                                                                                                                                                                                              |        |        |      |           |      |          |                |               |                    |              |     |    |     |     |     |
| 466 kcal                  | 2.3g                                                                                                                                                                                                                                                                                                                                                                                                                                     | 28.4g                                                                               | 14.7g                                                                                 | 2.6g         |           |      |          |                |               |                   |              |     |    |     |     |     |                                                                                                                                                                                                                                                                                                                                                                                                                                         |        |        |     |           |      |          |                |               |                   |            |     |    |     |     |     |                                                                                                                                                                                                                                                                                                                                                                                                                                              |        |        |      |           |      |          |                |               |                    |              |     |    |     |     |     |
| 23%                       | 3%                                                                                                                                                                                                                                                                                                                                                                                                                                       | 41%                                                                                 | 74%                                                                                   | 43%          |           |      |          |                |               |                   |              |     |    |     |     |     |                                                                                                                                                                                                                                                                                                                                                                                                                                         |        |        |     |           |      |          |                |               |                   |            |     |    |     |     |     |                                                                                                                                                                                                                                                                                                                                                                                                                                              |        |        |      |           |      |          |                |               |                    |              |     |    |     |     |     |
| Warning symbol            |                                                                                                                                                                                                                                                                                                                                                                                                                                          |  |  |              |           |      |          |                |               |                   |              |     |    |     |     |     |                                                                                                                                                                                                                                                                                                                                                                                                                                         |        |        |     |           |      |          |                |               |                   |            |     |    |     |     |     |                                                                                                                                                                                                                                                                                                                                                                                                                                              |        |        |      |           |      |          |                |               |                    |              |     |    |     |     |     |
