# Supplementary material for: Compared to other front-of-pack nutrition labels, the Nutri-Score emerged as the most efficient to inform Swiss consumers on the nutritional quality of food products
Source: PubMed Central journal article supplement (PMC7046267; doi:10.1371/journal.pone.0228179), 2020-02-27
Supplement: pone.0228179.s008.pdf [file pone.0228179.s008.pdf]

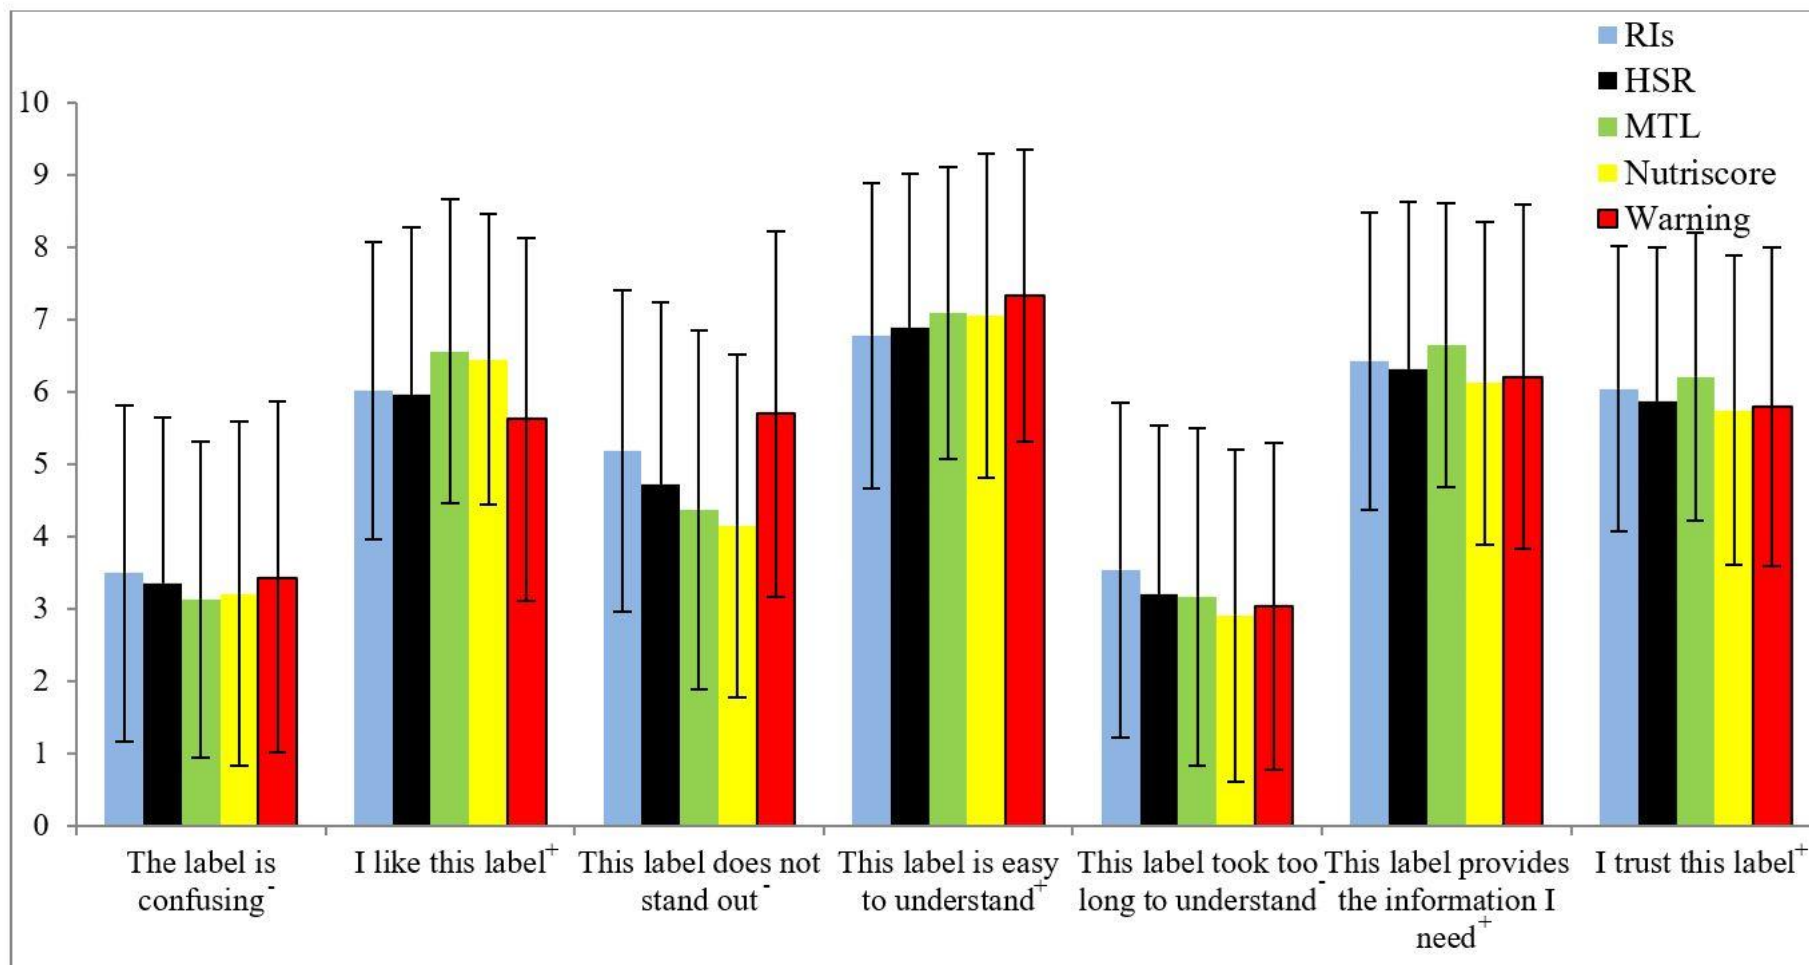

**S4 Fig. Average scores for perception questions**

*+ Positively valanced item; - Negatively valanced item*
