# Supplementary material for: Compared to other front-of-pack nutrition labels, the Nutri-Score emerged as the most efficient to inform Swiss consumers on the nutritional quality of food products
Source: PubMed Central journal article supplement (PMC7046267; doi:10.1371/journal.pone.0228179), 2020-02-27
Supplement: pone.0228179.s009.pdf [file pone.0228179.s009.pdf]

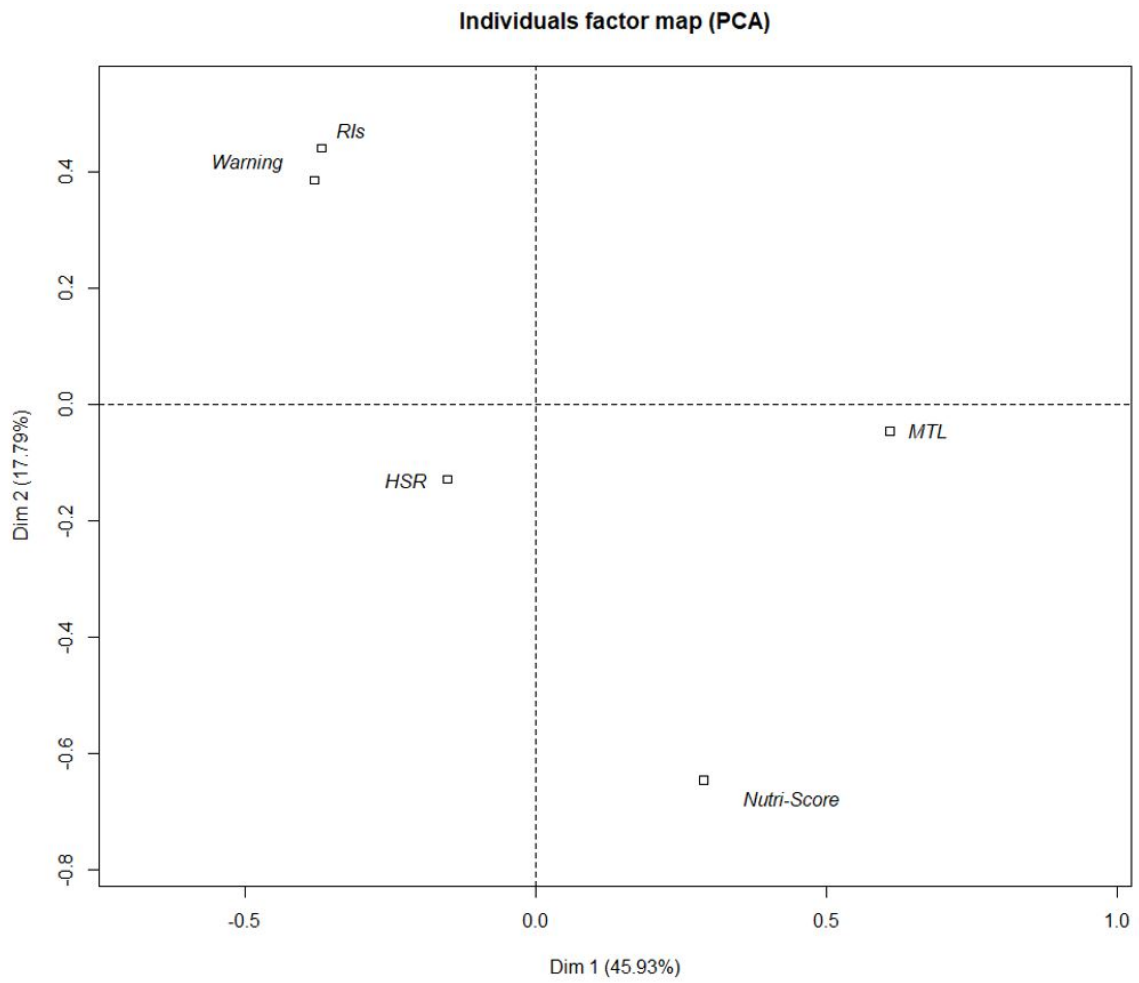

**S5 Fig. Principal component analysis map showing projection of the FoPLs across two dimensions**
